# Supplementary material for: Usefulness of a new foot switch for comport digestive endoscopic examination: a pilot study
Source: Springer Nature journal article supplement (doi:10.1007/s00464-025-11580-0), 2025-02-24
Supplement: MOESM2 [file 464_2025_11580_MOESM2_ESM.pdf]

# Foot switch evaluation sheet

This questionnaire evaluated the usefulness of a new foot switch for comport digestive endoscopic activity.

## Previous endoscopic examination experience

- ? Total number of prior esophagogastroduodenoscopies: \_\_\_\_\_
- ? Total number of prior colonoscopies: \_\_\_\_\_

## Choose the foot switch type.

- ? Conventional foot switch ☐
- ? New foot switch ☐

Please read the questions below and place a checkmark ( ☒ ) in the box at the bottom of the relevant item.

## 1. Comport manipulation of the foot switch

To take a snapshot, the examiner moves only part of the front foot slightly upward and downward. The examiner does not need to lift their legs or place both feet on the floor.

| 1                        | 2                        | 3                        | 4                        | 5                        | 6                        | 7                        |
|--------------------------|--------------------------|--------------------------|--------------------------|--------------------------|--------------------------|--------------------------|
| Strongly Disagree        | Disagree                 | Somewhat disagree        | Agree or disagree        | Somewhat agree           | Agree                    | Strongly agree           |
| <input type="checkbox"/> | <input type="checkbox"/> | <input type="checkbox"/> | <input type="checkbox"/> | <input type="checkbox"/> | <input type="checkbox"/> | <input type="checkbox"/> |

## 2. Comport endoscopic exam

Despite its long-term use, this foot switch does not induce asymmetric posture and musculoskeletal disorders. (Asymmetric posture, which involves an imbalance of the limbs, spine, and head, is a crucial factor contributing to musculoskeletal pain).

|   |   |   |   |   |   |   |
|---|---|---|---|---|---|---|
| 1 | 2 | 3 | 4 | 5 | 6 | 7 |
|---|---|---|---|---|---|---|

|                          |                          |                          |                          |                          |                          |                          |
|--------------------------|--------------------------|--------------------------|--------------------------|--------------------------|--------------------------|--------------------------|
| Strongly<br>Disagree     | Disagree                 | Somewhat<br>disagree     | Agree or<br>disagree     | Somewhat<br>agree        | Agree                    | Strongly<br>agree        |
| <input type="checkbox"/> | <input type="checkbox"/> | <input type="checkbox"/> | <input type="checkbox"/> | <input type="checkbox"/> | <input type="checkbox"/> | <input type="checkbox"/> |

### 3. Stable posture of the examiner

This foot switch helps stabilize the endoscopist's posture. (Symmetric posture induces comfort endoscopic exam by the good posture during endoscopy).

|                          |                          |                          |                          |                          |                          |                          |
|--------------------------|--------------------------|--------------------------|--------------------------|--------------------------|--------------------------|--------------------------|
| 1                        | 2                        | 3                        | 4                        | 5                        | 6                        | 7                        |
| Strongly<br>Disagree     | Disagree                 | Somewhat<br>disagree     | Agree or<br>disagree     | Somewhat<br>agree        | Agree                    | Strongly<br>agree        |
| <input type="checkbox"/> | <input type="checkbox"/> | <input type="checkbox"/> | <input type="checkbox"/> | <input type="checkbox"/> | <input type="checkbox"/> | <input type="checkbox"/> |

### 4. Musculoskeletal pain relief (Neck pain prevention and reduction):

This foot switch is helpful for musculoskeletal pain relief and prevention in the neck area.

|                          |                          |                          |                          |                          |                          |                          |
|--------------------------|--------------------------|--------------------------|--------------------------|--------------------------|--------------------------|--------------------------|
| 1                        | 2                        | 3                        | 4                        | 5                        | 6                        | 7                        |
| Strongly<br>Disagree     | Disagree                 | Somewhat<br>disagree     | Agree or<br>disagree     | Somewhat<br>agree        | Agree                    | Strongly<br>agree        |
| <input type="checkbox"/> | <input type="checkbox"/> | <input type="checkbox"/> | <input type="checkbox"/> | <input type="checkbox"/> | <input type="checkbox"/> | <input type="checkbox"/> |

### 5. Musculoskeletal pain relief (Back pain prevention and reduction)

This foot switch is helpful for musculoskeletal pain relief and prevention in the back area.

|                          |                          |                          |                          |                          |                          |                          |
|--------------------------|--------------------------|--------------------------|--------------------------|--------------------------|--------------------------|--------------------------|
| 1                        | 2                        | 3                        | 4                        | 5                        | 6                        | 7                        |
| Strongly<br>Disagree     | Disagree                 | Somewhat<br>disagree     | Agree or<br>disagree     | Somewhat<br>agree        | Agree                    | Strongly<br>agree        |
| <input type="checkbox"/> | <input type="checkbox"/> | <input type="checkbox"/> | <input type="checkbox"/> | <input type="checkbox"/> | <input type="checkbox"/> | <input type="checkbox"/> |

### 6. Musculoskeletal pain relief (Shoulder pain prevention and reduction)

This foot switch is helpful for musculoskeletal pain relief and prevention in the shoulder area.

|                          |                          |                          |                          |                          |                          |                          |
|--------------------------|--------------------------|--------------------------|--------------------------|--------------------------|--------------------------|--------------------------|
| 1                        | 2                        | 3                        | 4                        | 5                        | 6                        | 7                        |
| Strongly<br>Disagree     | Disagree                 | Somewhat<br>disagree     | Agree or<br>disagree     | Somewhat<br>agree        | Agree                    | Strongly<br>agree        |
| <input type="checkbox"/> | <input type="checkbox"/> | <input type="checkbox"/> | <input type="checkbox"/> | <input type="checkbox"/> | <input type="checkbox"/> | <input type="checkbox"/> |

### 7. Musculoskeletal pain relief (Pelvic pain prevention and reduction)

This foot switch is helpful for musculoskeletal pain relief and prevention in

the pelvic area.

| 1                        | 2                        | 3                        | 4                        | 5                        | 6                        | 7                        |
|--------------------------|--------------------------|--------------------------|--------------------------|--------------------------|--------------------------|--------------------------|
| Strongly Disagree        | Disagree                 | Somewhat disagree        | Agree or disagree        | Somewhat agree           | Agree                    | Strongly agree           |
| <input type="checkbox"/> | <input type="checkbox"/> | <input type="checkbox"/> | <input type="checkbox"/> | <input type="checkbox"/> | <input type="checkbox"/> | <input type="checkbox"/> |

### **8. Musculoskeletal pain relief (knee pain prevention and reduction)**

This type of foot switch is helpful for musculoskeletal pain relief and prevention in the knee area.

| 1                        | 2                        | 3                        | 4                        | 5                        | 6                        | 7                        |
|--------------------------|--------------------------|--------------------------|--------------------------|--------------------------|--------------------------|--------------------------|
| Strongly Disagree        | Disagree                 | Somewhat disagree        | Agree or disagree        | Somewhat agree           | Agree                    | Strongly agree           |
| <input type="checkbox"/> | <input type="checkbox"/> | <input type="checkbox"/> | <input type="checkbox"/> | <input type="checkbox"/> | <input type="checkbox"/> | <input type="checkbox"/> |

### **9. Overall fatigue reduction**

- This foot switch reduces overall fatigue associated with endoscopic activity.
- This foot switch reduces inappropriate ergonomic settings, which increases musculoskeletal disorders among high-volume endoscopists.

| 1                        | 2                        | 3                        | 4                        | 5                        | 6                        | 7                        |
|--------------------------|--------------------------|--------------------------|--------------------------|--------------------------|--------------------------|--------------------------|
| Strongly Disagree        | Disagree                 | Somewhat disagree        | Agree or disagree        | Somewhat agree           | Agree                    | Strongly agree           |
| <input type="checkbox"/> | <input type="checkbox"/> | <input type="checkbox"/> | <input type="checkbox"/> | <input type="checkbox"/> | <input type="checkbox"/> | <input type="checkbox"/> |

### **10. Inspection time (Efficiency of endoscopic examination)**

This foot switch helps shorten endoscopy time (regarding manipulation and musculoskeletal pain).

| 1                        | 2                        | 3                        | 4                        | 5                        | 6                        | 7                        |
|--------------------------|--------------------------|--------------------------|--------------------------|--------------------------|--------------------------|--------------------------|
| Strongly Disagree        | Disagree                 | Somewhat disagree        | Agree or disagree        | Somewhat agree           | Agree                    | Strongly agree           |
| <input type="checkbox"/> | <input type="checkbox"/> | <input type="checkbox"/> | <input type="checkbox"/> | <input type="checkbox"/> | <input type="checkbox"/> | <input type="checkbox"/> |

### **11. Concentration (Efficiency of endoscopic examination:)**

This foot switch helps concentration (regarding manipulation and

musculoskeletal pain).

[illegible]

## 12. Applicability with endoscopic mucosal resection

This foot switch can be applied for comfort endoscopic mucosal resection.

[illegible]

### 13. Applicability with endoscopic submucosal dissection

This foot switch can be applied for comfort endoscopic submucosal dissection.

[illegible]

#### 14. Applicability with endoscopic retrograde cholangiopancreatography

This foot switch can be applied for comfort endoscopic retrograde cholangiopancreatography.

[illegible]

### 15. Applicability with surgical knife such as Bovie knife

The foot switch can be applied for the comfort use of a surgical knife such as Bovie knife.

[illegible]
